# Supplementary material
Source: PubMed Central journal article supplement (PMC4677049)
Supplement: NIHMS730749-supplement-Supplemental.pdf [file NIHMS730749-supplement-Supplemental.pdf]

| Complex PDB (a) | Class (b) | Unbound PDB 1 | Component 1                          | Unbound PDB 2 | Component 2                                           | iRMSD (Å) (c) | $\Delta$ ASA (Å <sup>2</sup> ) (d) | Kd (M)   | $\Delta G$ (kcal/mol) (e) | Temp. (K) | pH  | Method (f) | Ref. (g) |
|-----------------|-----------|---------------|--------------------------------------|---------------|-------------------------------------------------------|---------------|------------------------------------|----------|---------------------------|-----------|-----|------------|----------|
| 3H2V_A:E        | OX        | 3MYL_A        | Vinculin tail domain                 | 1WI6_A(8)     | Raver1 RRM1 domain                                    | 0.8           | 1263                               | 2.21e-5  | -6.31                     | 296.0     | 8   | ITC        | 1        |
| 3DAW_A:B        | OX        | 1IJL_A        | Alpha actin                          | 2HD7_A(5)     | Twinfilin-1 C-terminal domain                         | 1.49          | 2323                               | 2e-5     | -6.41                     |           |     | SA         | 2        |
| 4HX3_BD:A       | EI        | 4HWX_AB       | Neutral proteinase inhibitor ScNPI   | 1C7K_A        | Zinc endoprotease                                     | 0.9           | 2086                               | 6e-6     | -7.41                     | 310.0     | 7.4 | SA         | 3        |
| 3HI6_XY:B       | A         | 3HI5_HL       | AL-57 Fab fragment                   | 1MJN_A        | Integrin alpha-L I domain                             | 1.65          | 1871                               | 4.7e-6   | -7.27                     |           | 7.4 | SPR        | 4        |
| 2X9A_D:C        | OR        | 1S62_A(8)     | Tola C-terminal domain               | 2X9B_A        | G3P Tola binding domain                               | 1.33          | 1571                               | 4.4e-6   | -7.31                     | 298.0     | 7   | SA         | 5        |
| 3R9A_AC:B       | OR        | 1H0C_AB       | Alanine-glyoxylate aminotransferase  | 2C0M_A        | PEX5P TPR repeat domain                               | 1.91          | 1926                               | 3.5e-6   | -7.44                     | 298.0     | 7.5 | ITC        | 6        |
| 1M27_AB:C       | OX        | 1D4T_AB       | SAP-SLAM Complex                     | 3UA6_A        | Fyn kinase SH3 domain                                 | 1.22          | 799                                | 3.45e-6  | -7.45                     | 298.0     | 8   | ITC        | 7        |
| 3A4S_A:D        | EI        | 1A3S_A        | SUMO-conjugating enzyme UBC9         | 3A4R_A        | NFATC2-interacting protein SLD2 ubiquitin-like domain | 0.72          | 1116                               | 2.81e-6  | -7.57                     | 298.0     | 7.5 | ITC        | 8        |
| 3F1P_A:B        | OX        | 1P97_A(9)     | HIF2 alpha C-terminal PAS domain     | 1X0O_A(5)     | ARNT C-terminal PAS domain                            | 2.52          | 1919                               | 1.4e-6   | -7.85                     | 293.0     | 7.5 | ITC        | 9        |
| 4M76_A:B        | OR        | 1C3D_A        | C3D                                  | 1M1U_A        | Integrin alpha-M CD11B A-domain                       | 0.43          | 1046                               | 4.5e-7   | -8.66                     | 298.0     | 7.5 | ITC        | 10       |
| 3LVK_AC:B       | E         | 3LVM_AB       | Cysteine desulfurase IscS            | 1DCJ_A(12)    | Sulfurtransferase tusA                                | 0.81          | 1609                               | 3.04e-7  | -8.89                     | 298.0     | 7.4 | SPR        | 11       |
| 3L89_ABC:M      | OR        | 3L88_ABC      | Ad21 fiber knob                      | 1CKL_A        | CD46 SCR1 and SCR2 domains                            | 2.51          | 2167                               | 2.84e-7  | -8.93                     | 298.0     | 7.4 | SPR        | 12       |
| 4IZ7_A:B        | EI        | 1ERK_A        | Non-phosphorylated ERK               | 2LS7_A(1)     | PEA-15 Death Effector Domain                          | 1.56          | 1202                               | 1.33e-7  | -9.44                     | 300.0     | 7.5 | SA         | 13       |
| 3K75_D:B        | ER        | 1BPB_A        | DNA polymerase beta                  | 3K77_A        | Reduced XRCC1, N-terminal domain                      | 0.64          | 1195                               | 1.1e-7   | -9.49                     |           | 7.5 | SA         | 14       |
| 3PC8_A:C        | ER        | 3PC6_A        | DNA repair protein XRCC1             | 3PC7_A        | DNA ligase III-alpha BRCT domain                      | 0.5           | 1240                               | 1.02e-7  | -9.54                     |           | 7.5 | SPR        | 15       |
| 3BIW_A:E        | OX        | 3BIX_A        | Neuroigin-1                          | 2R1D_A        | Neuroigin-1-beta                                      | 0.39          | 1191                               | 9.7e-8   | -9.41                     | 293.0     | 7.2 | ITC        | 16       |
| 3SZK_DE:F       | OX        | 3ODQ_AB       | MetHaemoglobin                       | 2H3K_A        | ISDH-N1                                               | 2.1           | 1263                               | 9.01e-8  | -9.45                     | 293.0     | 7.5 | ITC        | 17       |
| 3AAA_AB:C       | OX        | 3AA7_AB       | Actin capping protein                | 1MYO_A(30)    | Myotrophin                                            | 1.78          | 1686                               | 2.1e-8   | -10.30                    | 293.0     | 7   | SPR        | 18       |
| 3RVW_CD:A       | A         | 3RVT_CD       | 4C1 Fab                              | 3F5V_A        | DER P 1 allergen                                      | 0.5           | 1383                               | 1.9e-8   | -10.53                    | 298.0     | 7.5 | ITC        | 19       |
| 3BX7_A:C        | OX        | 3BX8_A        | Lipocalin 2                          | 3OSK_A        | CTLA-4 extracellular domain                           | 1.63          | 2349                               | 9e-9     | -10.98                    | 298.0     | 7.4 | SPR        | 20       |
| 3MXW_LH:A       | A         | 3MXV_LH       | Anti-Shh 5E1 chimera Fab fragment    | 3M1N_A        | Sonic Hedgehog N-terminal domain                      | 0.48          | 1696                               | 7e-9     | -11.31                    | 303.0     | 7.2 | ITC        | 21       |
| 4GXU_MN:ABEFCD  | A         | 4GXV_HL       | 1F1 antibody                         | 1RUZ_HIJKLM   | 1918 H1 Hemagglutinin                                 | 0.78          | 1830                               | 6.2e-9   | -11.20                    |           |     | BLI        | 22       |
| 4G6J_HL:A       | A         | 4G5Z_HL       | Canakinumab antibody fragment        | 4IIB_A        | Interleukin-1 beta                                    | 0.61          | 1893                               | 4.1e-9   | -11.44                    | 298.0     | 7.4 | TP         | 23       |
| 3V6Z_AB:F       | A         | 3V6F_AB       | Fab E6                               | 3KXS_F        | Capsid protein assembly domain                        | 1.83          | 1922                               | 3.3e-9   | -11.57                    |           | 7.4 | SPR        | 24       |
| 3S9D_B:A        | OR        | 1N6U_A(15)    | IFNAR2                               | 1ITF_A(9)     | IFN $\alpha$ 2                                        | 1.69          | 1841                               | 3e-9     | -11.63                    |           | 7.5 | SA         | 25       |
| 3EOA_LH:I       | A         | 3EO9_LH       | Efalizumab Fab fragment              | 3F74_A        | Integrin alpha-L I domain                             | 0.39          | 1272                               | 2.2e-9   | -11.81                    | 298.0     | 7.4 | SPR        | 26       |
| 2GAF_D:A        | ER        | 3OWG_A        | Poly(A) polymerase VP55              | 1VPT_A        | Vaccinia protein VP39                                 | 0.69          | 3368                               | 1.2e-9   | -12.17                    |           | 7   | SPR        | 27       |
| 4FQL_HL:ABEFCD  | A         | 4FQH_HL       | CR9114 Fab                           | 2FK0_ABCDEF   | H5N1 influenza virus hemagglutinin                    | 1.08          | 1459                               | 9e-10    | -12.55                    | 303.0     | 7.4 | BLI        | 28       |
| 2VXT_HL:I       | A         | 2VXU_HL       | Murine reference antibody 125-2H Fab | 1J0S_A(6)     | Interleukin-18                                        | 1.33          | 2163                               | 5.33e-10 | -12.65                    |           |     | SPR        | 29       |
| 4G6M_HL:A       | A         | 4G6K_HL       | Gevokizumab antibody fragment        | 4IIB_A        | Interleukin-1 beta                                    | 0.49          | 1673                               | 2.9e-10  | -13.01                    | 298.0     | 7.4 | TP         | 23       |
| 2W9E_HL:A       | A         | 2W9D_HL       | ICSM 18 Fab fragment                 | 1QM1_A        | Prion protein fragment                                | 1.13          | 1677                               | 1.3e-10  | -13.49                    |           | 9.6 | ELISA      | 30       |
| 3L5W_LH:I       | A         | 3L7E_LH       | C836 Fab                             | 1IK0_A(11)    | Interleukin-13                                        | 0.48          | 1138                               | 5.4e-11  | -14.01                    | 298.0     | 7.4 | SPR        | 31       |
| 4DN4_LH:M       | A         | 4DN3_LH       | CNTO888 Fab                          | 1DOLA         | MCP-1                                                 | 0.81          | 1317                               | 3.8e-11  | -14.22                    | 298.0     | 7.1 | SPR        | 32       |
| 1JTD_B:A        | EI        | 3Q10_A        | BLIP-II                              | 1BTL_A        | TEM-1 beta-lactamase                                  | 0.44          | 2180                               | 2.72e-11 | -14.41                    | 298.0     | 7   | SA         | 33       |
| 3G6D_LH:A       | A         | 3G6A_LH       | CNTO607 Fab                          | 1IK0_A(10)    | Interleukin-13                                        | 1.86          | 1793                               | 1.84e-11 | -14.65                    | 298.0     | 7.3 | SPR        | 34       |

**Supporting Table 1:** New interactions in version 2 of the structural affinity benchmark. Notes: (a) PDB entry with the chain codes noted AB:C to represent a complex where chains A and B make up component 1, chain C, component 2. Some of the unbound components have NMR structures; the number in parentheses refers to a model in the NMR ensemble. The processed coordinate files may be downloaded from <http://zlab.umassmed.edu/benchmark/> (b) Functional classes: A antigen/antibody; EI enzyme/inhibitor; ER enzyme complex with a regulatory or accessory chain; OR receptor containing; OX miscellaneous. (c) Root-mean-square displacement of the C $\alpha$  atoms of interface residues of the two partners after the unbound and the bound interfaces have been superimposed by least-square. (d) Change in accessible surface area (ASA) between the complex and its components in bound conformation. (e)  $\Delta G = -RT \ln K$ ; temperatures are as reported, with "ambient" or "not stated" set to 298 K. Additional kinetic and thermodynamic are available online at <http://bmm.cancerresearchuk.org/~bmmadmin/Affinity> (f) Method used to determine affinity: ITC isothermal titration calorimetry; SA spectroscopic assay; SPR surface plasmon resonance; BLI biolayer interferometry; TP thermophoresis; ELISA enzyme-linked immunosorbent assay. (g) Primary citation as listed below. Additional references and corroborating data are available online at <http://bmm.cancerresearchuk.org/~bmmadmin/Affinity>

| Complex | $\Delta G$ (kcal/mol) | $\Delta ASA$ | DComplex | DOPE  | PyDock | SIPPER | FireDock | DDG_CU | DDG_CW | DDG_AU | DDG_AW | DDG_V  | MARS   | RF     | RBF    | M5'    | ConsBind | SolveBind | ZAPP   | IRAD    | ZRANK   | ZDOCK  | $\Delta ASA/ RMSD$ |
|---------|-----------------------|--------------|----------|-------|--------|--------|----------|--------|--------|--------|--------|--------|--------|--------|--------|--------|----------|-----------|--------|---------|---------|--------|--------------------|
| 1M27    | -7.45                 | 799          | -9.27    | -499  | -36.20 | 2.72   | -21.15   | -9.56  | -8.72  | -11.29 | -10.84 | -10.56 | -8.61  | -8.01  | -6.25  | -7.75  | -7.65    | 6.30      | -8.23  | -138.84 | -82.13  | 644.2  | 6.61               |
| 3PC8    | -9.54                 | 1240         | -14.67   | -770  | -28.96 | 6.09   | -60.48   | -3.87  | -6.28  | -9.05  | -15.47 | -20.36 | -9.62  | -8.82  | -9.33  | -7.91  | -8.92    | 5.55      | -9.46  | -215.42 | -103.27 | 1108.4 | 10.39              |
| 3BIW    | -9.41                 | 1191         | -9.66    | -681  | -18.71 | 0.66   | -18.34   | -0.13  | -3.14  | -3.21  | -7.69  | -12.41 | -7.87  | -7.83  | -6.42  | -10.72 | -8.21    | 7.25      | -9.69  | -120.07 | -69.44  | 516.8  | 10.37              |
| 3F1P    | -7.85                 | 1919         | -18.28   | -1521 | -44.79 | 14.04  | -50.20   | -2.11  | -4.61  | -9.28  | -18.02 | -29.53 | -8.87  | -10.64 | -14.22 | -17.52 | -12.82   | 8.93      | -10.89 | -233.74 | -87.55  | 1299.3 | 9.57               |
| 3A4S    | -7.57                 | 1116         | -11.30   | -643  | -37.00 | 2.85   | -29.43   | -10.00 | -11.97 | -9.54  | -14.03 | -11.81 | -10.28 | -7.99  | -6.82  | -6.08  | -7.79    | 5.58      | -8.03  | -177.25 | -109.72 | 902.0  | 9.46               |
| 2X9A    | -7.31                 | 1571         | -17.03   | -945  | -21.02 | 1.64   | -82.03   | -10.36 | -18.63 | -16.73 | -27.46 | -22.05 | -11.31 | -12.30 | -11.89 | -14.39 | -12.47   | 7.24      | -10.15 | -222.07 | -116.17 | 1302.4 | 9.06               |
| 3L89    | -8.93                 | 2167         | -13.68   | -1446 | -21.95 | 8.68   | -45.87   | -3.72  | -6.21  | -10.31 | -19.61 | -27.60 | -9.57  | -9.93  | -8.90  | -10.35 | -9.69    | 10.19     | -12.05 | -218.08 | -127.60 | 1238.1 | 10.51              |
| 4HX3    | -7.41                 | 2086         | -16.70   | -1372 | -29.60 | 4.68   | -41.56   | -7.70  | -3.84  | -7.07  | -18.38 | -23.96 | -8.61  | -10.73 | -13.63 | -10.35 | -10.83   | 10.03     | -12.80 | -221.45 | -118.88 | 1235.4 | 12.65              |
| 3H2V    | -6.31                 | 1263         | -9.53    | -712  | -13.64 | -0.29  | 2.30     | -1.86  | -3.44  | -6.85  | -9.37  | -13.35 | -8.58  | -8.22  | -8.89  | -7.75  | -8.36    | 5.99      | -7.45  | -114.67 | -58.88  | 672.5  | 9.81               |
| 3AAA    | -10.30                | 1686         | -13.84   | -1123 | -43.31 | 0.45   | -60.77   | -6.54  | -7.19  | -15.89 | -20.28 | -19.73 | -11.36 | -11.28 | -10.45 | -8.67  | -10.44   | 7.01      | -9.90  | -244.97 | -131.67 | 1257.6 | 8.68               |
| 4IZ7    | -9.44                 | 1202         | -10.75   | -717  | -26.59 | 5.03   | -37.98   | -7.02  | -5.37  | -10.06 | -13.26 | -19.02 | -8.74  | -8.82  | -9.29  | -9.36  | -9.05    | 6.76      | -9.98  | -160.50 | -81.94  | 881.3  | 6.84               |
| 3SZK    | -9.45                 | 1263         | -11.16   | -1128 | -19.30 | 1.27   | -7.58    | -12.35 | -13.07 | -9.10  | -15.60 | -16.95 | -9.16  | -9.36  | -11.27 | -11.47 | -10.31   | 6.34      | -9.53  | -135.20 | -69.74  | 704.4  | 7.07               |
| 1JTD    | -14.41                | 2180         | -19.50   | -1910 | -48.40 | 12.04  | -53.71   | -8.29  | -17.27 | -19.10 | -29.19 | -29.32 | -13.64 | -12.42 | -12.65 | -11.34 | -12.51   | 8.88      | -13.51 | -234.03 | -99.64  | 1729.0 | 14.05              |
| 3S9D    | -11.63                | 1841         | -15.52   | -1082 | -32.77 | 10.16  | -56.36   | -11.61 | -14.45 | -10.30 | -16.87 | -25.54 | -11.23 | -10.68 | -12.58 | -11.34 | -11.46   | 8.14      | -11.41 | -186.75 | -92.79  | 1262.9 | 9.27               |
| 2GAF    | -12.17                | 3368         | -19.44   | -1949 | -41.41 | 7.73   | -48.72   | -13.37 | -18.50 | -16.22 | -36.96 | -39.10 | -9.00  | -12.29 | -11.42 | -8.67  | -10.34   | 11.58     | -10.01 | -292.91 | -150.15 | 1622.1 | 18.09              |
| 3K75    | -9.49                 | 1195         | -12.43   | -1011 | -36.98 | 2.73   | -51.09   | -3.08  | -10.34 | -5.05  | -12.58 | -18.86 | -9.77  | -8.73  | -11.27 | -7.75  | -9.38    | 6.10      | -10.46 | -142.06 | -69.75  | 817.7  | 9.94               |
| 3R9A    | -7.44                 | 1926         | -15.28   | -959  | -17.93 | -2.26  | -30.09   | 2.71   | 1.23   | -8.52  | -24.01 | -25.80 | -7.54  | -10.59 | -7.36  | -10.22 | -8.92    | 7.47      | -9.05  | -180.61 | -105.48 | 1007.7 | 9.59               |
| 3LVK    | -8.89                 | 1609         | -11.46   | -902  | -43.02 | 11.12  | -43.88   | -4.24  | -5.90  | -13.58 | -25.16 | -17.49 | -9.85  | -9.23  | -10.09 | -7.75  | -9.23    | 6.25      | -7.27  | -235.72 | -122.70 | 1524.6 | 11.10              |
| 3BX7    | -10.98                | 2349         | -21.48   | -1627 | -44.46 | 10.31  | -75.21   | -7.48  | -10.34 | -7.30  | -19.53 | -37.80 | -10.80 | -11.75 | -12.00 | -14.39 | -12.24   | 9.57      | -11.00 | -268.18 | -129.98 | 1697.1 | 11.20              |
| 3DAW    | -6.41                 | 2323         | -19.23   | -1519 | -28.45 | 9.75   | -107.16  | -9.62  | -11.75 | -16.94 | -25.66 | -33.67 | -10.66 | -12.17 | -12.60 | -10.42 | -11.46   | 8.47      | -11.28 | -319.66 | -161.42 | 1650.0 | 11.15              |
| 4M76    | -8.66                 | 1046         | -9.68    | -499  | -8.15  | 0.39   | -10.81   | -4.46  | -7.06  | -6.59  | -14.49 | -8.76  | -7.93  | -7.18  | -5.88  | -6.08  | -6.77    | 5.18      | -7.31  | -94.73  | -44.33  | 577.8  | 9.76               |
| 3G6D    | -14.65                | 1793         | -16.16   | -1238 | -57.10 | 15.33  | -61.34   | -8.25  | -12.70 | -16.31 | -19.21 | -25.67 | -12.58 | -12.60 | -12.90 | -16.35 | -13.61   | 9.14      | -11.30 | -278.12 | -141.04 | 1423.9 | 9.09               |
| 3L5W    | -14.01                | 1138         | -11.06   | -895  | -31.50 | 4.88   | -48.21   | -12.59 | -14.66 | -14.92 | -17.09 | -18.31 | -10.50 | -10.15 | -9.53  | -13.83 | -11.00   | 7.87      | -9.67  | -174.44 | -78.23  | 1098.7 | 10.03              |
| 3V6Z    | -11.57                | 1922         | -15.10   | -1746 | -43.74 | 16.11  | -62.69   | -4.34  | -10.90 | -13.36 | -19.06 | -29.90 | -13.08 | -12.28 | -10.79 | -14.39 | -12.63   | 9.61      | -14.09 | -223.07 | -111.87 | 1344.4 | 9.58               |
| 4G6J    | -11.44                | 1893         | -16.10   | -1463 | -27.70 | 2.01   | -60.16   | -13.75 | -15.62 | -19.27 | -26.18 | -23.01 | -11.21 | -10.90 | -13.65 | -8.67  | -11.11   | 9.18      | -12.03 | -215.20 | -104.43 | 1282.9 | 12.66              |
| 4G6M    | -13.01                | 1673         | -14.66   | -1488 | -18.48 | 1.07   | -45.44   | -12.94 | -10.05 | -22.64 | -22.54 | -21.79 | -9.71  | -10.78 | -13.89 | -12.39 | -11.69   | 8.78      | -12.98 | -232.79 | -117.86 | 1249.9 | 12.05              |
| 2VXT    | -12.65                | 2163         | -21.28   | -1457 | -46.26 | 4.89   | -76.01   | -19.35 | -20.28 | -25.99 | -35.82 | -31.97 | -13.03 | -12.44 | -11.99 | -12.59 | -12.51   | 9.30      | -12.55 | -318.30 | -160.11 | 1687.4 | 11.31              |
| 3EOA    | -11.81                | 1272         | -12.46   | -892  | -33.64 | 5.73   | -43.08   | -6.65  | -8.06  | -9.68  | -13.72 | -17.16 | -10.31 | -9.57  | -9.54  | -9.36  | -9.69    | 7.36      | -9.66  | -167.36 | -82.97  | 1148.2 | 10.68              |
| 3HI6    | -7.27                 | 1871         | -16.41   | -1391 | -51.66 | 8.12   | -51.64   | -3.84  | -9.37  | -11.10 | -22.10 | -26.79 | -13.50 | -10.39 | -9.57  | -10.35 | -10.95   | 9.15      | -11.88 | -235.06 | -113.86 | 1455.8 | 9.38               |
| 3RVW    | -10.53                | 1383         | -13.96   | -1174 | -29.63 | 7.10   | -9.45    | -6.13  | -7.48  | -7.18  | -8.46  | -18.17 | -8.68  | -9.94  | -13.56 | -9.36  | -10.39   | 9.05      | -10.61 | -169.67 | -74.46  | 1233.7 | 10.93              |
| 2W9E    | -13.49                | 1677         | -16.05   | -1471 | -37.82 | 5.58   | -35.00   | -5.81  | -9.27  | -9.17  | -14.17 | -18.96 | -10.54 | -10.90 | -15.97 | -12.39 | -12.45   | 9.38      | -10.82 | -234.13 | -98.88  | 1353.8 | 10.30              |
| 3MXW    | -11.31                | 1696         | -18.63   | -1405 | -44.13 | 5.25   | -68.89   | -11.60 | -10.56 | -20.70 | -15.80 | -20.11 | -11.06 | -11.22 | -12.15 | -13.83 | -12.06   | 8.79      | -10.17 | -300.39 | -150.62 | 1503.3 | 12.15              |
| 4DN4    | -14.22                | 1317         | -13.77   | -779  | -23.25 | 8.64   | -74.64   | -11.24 | -15.81 | -15.04 | -24.80 | -20.32 | -11.03 | -11.01 | -10.02 | -13.83 | -11.47   | 7.57      | -10.96 | -235.64 | -112.60 | 1236.6 | 9.99               |
| 4FQI    | -12.55                | 1459         | -13.65   | -1220 | -46.91 | 8.34   | -63.13   | -8.36  | -11.33 | -11.22 | -23.76 | -22.07 | -12.64 | -11.43 | -12.32 | -7.88  | -11.07   | 7.78      | -11.25 | -201.69 | -93.54  | 1405.9 | 9.66               |
| 4GXU    | -11.20                | 1830         | -11.56   | -1089 | -5.61  | -2.46  | -6.52    | -6.36  | -9.91  | -5.61  | -20.73 | -21.64 | -8.88  | -10.18 | -8.83  | -10.22 | -9.53    | 9.00      | -7.83  | -105.82 | -48.78  | 798.7  | 12.02              |

**Supporting Table 2:** Predicted affinities. See main text for descriptions of the scoring functions.

| PDB code* | Light Chain                                            | Light Chain                                | Light Chain                                   | Heavy Chain                                | Heavy Chain                                             | Heavy Chain                                                                                 |
|-----------|--------------------------------------------------------|--------------------------------------------|-----------------------------------------------|--------------------------------------------|---------------------------------------------------------|---------------------------------------------------------------------------------------------|
|           | L1                                                     | L2                                         | L3                                            | H1                                         | H2                                                      | H3                                                                                          |
| 3G6D_LH   | 26, 27, 28, 29, 30, 31, 32, 33                         | 45, 46, 47, 48, 49, 50, 51, 52, 53, 54, 55 | 88, 89, 90, 91, 92, 93, 94, 95, 96            | 27, 28, 29, 30, 31, 32, 33, 34, 35         | 47, 48, 49, 50, 51, 52, 53, 54, 55, 56, 57, 58, 59, 60  | 98, 99, 100, 101, 102, 103, 104, 105, 106, 107, 108, 109, 110, 111                          |
| 3L5W_LH   | 27, 28, 29, 30, 31, 32, 33, 34                         | 46, 47, 48, 49, 50, 51, 52, 53, 54, 55, 56 | 89, 90, 91, 92, 93, 94, 95, 96                | 27, 28, 29, 30, 31, 32, 33, 34, 35, 36, 37 | 49, 50, 51, 52, 53, 54, 55, 56, 57, 58, 59, 60, 61      | 99, 100, 101, 102, 103, 104, 105, 106, 107, 108, 109, 110                                   |
| 3V6Z_BA   | 27, 28, 29, 30, 31, 32, 33, 34, 35, 36, 37, 38, 39, 40 | 52, 53, 54, 55, 56, 57, 58, 59, 60, 61, 62 | 95, 96, 97, 98, 99, 100, 101, 102, 103        | 27, 28, 29, 30, 31, 32, 33, 34, 35         | 47, 48, 49, 50, 51, 52, 53, 54, 55, 56, 57, 58, 59, 60  | 98, 99, 100, 101, 102, 103, 104, 105, 106, 107, 108, 109, 110, 111, 112                     |
| 4G6J_LH   | 27, 28, 29, 30, 31, 32, 33, 34                         | 46, 47, 48, 49, 50, 51, 52, 53, 54, 55, 56 | 89, 90, 91, 92, 93, 94, 95, 96                | 27, 28, 29, 30, 31, 32, 33, 34, 35         | 47, 48, 49, 50, 51, 52, 53, 54, 55, 56, 57, 58, 59, 60  | 98, 99, 100, 101, 102, 103, 104, 105, 106, 107                                              |
| 4G6M_LH   | 27, 28, 29, 30, 31, 32, 33, 34                         | 46, 47, 48, 49, 50, 51, 52, 53, 54, 55, 56 | 89, 90, 91, 92, 93, 94, 95, 96                | 27, 28, 29, 30, 31, 32, 33, 34, 35, 36, 37 | 49, 50, 51, 52, 53, 54, 55, 56, 57, 58, 59, 60, 61      | 99, 100, 101, 102, 103, 104, 105, 106, 107, 108, 109                                        |
| 2VXT_LH   | 27, 28, 29, 30, 31, 32, 33, 34                         | 46, 47, 48, 49, 50, 51, 52, 53, 54, 55, 56 | 89, 90, 91, 92, 93, 94, 95, 96                | 27, 28, 29, 30, 31, 32, 33, 34, 35         | 47, 48, 49, 50, 51, 52, 52A, 53, 54, 55, 56, 57, 58, 59 | 94, 95, 96, 101, 102                                                                        |
| 3EOA_LH   | 27, 28, 29, 30, 31, 32, 33, 34                         | 46, 47, 48, 49, 50, 51, 52, 53, 54, 55, 56 | 89, 90, 91, 92, 93, 94, 95, 96                | 27, 28, 29, 30, 31, 32, 33, 34, 35         | 47, 48, 49, 50, 51, 52, 53, 54, 55, 56, 57, 58, 59, 60  | 98, 99, 100, 101, 102, 103, 104, 105, 106, 107, 108, 109, 110                               |
| 3HI6_LH   | 27, 28, 29, 30, 31, 32, 33, 34                         | 46, 47, 48, 49, 50, 51, 52, 53, 54, 55, 56 | 89, 90, 91, 92, 93, 94, 95                    | 27, 28, 29, 30, 31, 32, 33, 34, 35         | 47, 48, 49, 50, 51, 52, 53, 54, 55, 56, 57, 58, 59, 60  | 98, 99, 100, 101, 102, 103, 104, 105, 106, 107, 108, 109                                    |
| 3RVW_CD   | 27, 28, 29, 30, 31, 32, 33, 34                         | 46, 47, 48, 49, 50, 51, 52, 53, 54, 55, 56 | 89, 90, 91, 92, 93, 94, 95                    | 27, 28, 29, 30, 31, 32, 33, 34, 35, 36     | 48, 49, 50, 51, 52, 53, 54, 55, 56, 57, 58, 59, 60      | 98, 99, 100, 101, 102, 103, 104, 105, 106, 107, 108, 109, 110                               |
| 2W9E_LH   | 27, 28, 29, 30, 31, 32, 33                             | 45, 46, 47, 48, 49, 50, 51, 52, 53, 54, 55 | 88, 89, 90, 91, 92, 93, 94, 95                | 27, 28, 29, 30, 31, 32, 33, 34, 35         | 47, 48, 49, 50, 51, 52, 53, 54, 55, 56, 57, 58, 59, 60  | 98, 99, 100, 101, 102, 103, 104, 105                                                        |
| 3MXW_LH   | 27, 28, 29, 30, 31, 32, 33, 34                         | 46, 47, 48, 49, 50, 51, 52, 53, 54, 55, 56 | 89, 90, 91, 92, 93, 94, 95, 96                | 27, 28, 29, 30, 31, 32, 33, 34, 35         | 47, 48, 49, 50, 51, 52, 53, 54, 55, 55A, 56, 57, 58, 59 | 94, 95, 96, 97, 98, 99, 100, 100A, 100K, 101, 102                                           |
| 4DN4_LH   | 27, 28, 29, 30, 31, 32, 33, 34, 35                     | 47, 48, 49, 50, 51, 52, 53, 54, 55, 56, 57 | 90, 91, 92, 93, 94, 95, 96, 97, 98            | 27, 28, 29, 30, 31, 32, 33, 34, 35         | 47, 48, 49, 50, 51, 52, 53, 54, 55, 56, 57, 58, 59, 60  | 98, 99, 100, 101, 102, 103, 104, 105, 106, 107, 108                                         |
| 3EO1_AB   | 27, 28, 29, 30, 31, 32, 33, 34, 35                     | 47, 48, 49, 50, 51, 52, 53, 54, 55, 56, 57 | 90, 91, 92, 93, 94, 95, 96, 97                | 27, 28, 29, 30, 31, 32, 33, 34, 35         | 47, 48, 49, 50, 51, 52, 53, 54, 55, 56, 57, 58, 59, 60  | 98, 99, 100, 101, 102, 103, 104, 105, 106, 107, 108, 109                                    |
| 3HMX_LH   | 27, 28, 29, 30, 31, 32, 33, 34                         | 46, 47, 48, 49, 50, 51, 52, 53, 54, 55, 56 | 89, 90, 91, 92, 93, 94, 95, 96                | 27, 28, 29, 30, 31, 32, 33, 34, 35         | 47, 48, 49, 50, 51, 52, 53, 54, 55, 56, 57, 58, 59, 60  | 98, 99, 100, 101, 102, 103, 104, 105, 106, 107, 108                                         |
| 4FQL_LH   | 27, 27A, 27B, 28, 29, 30, 31, 32, 33, 34               | 46, 47, 48, 49, 50, 51, 52, 53, 54, 55, 56 | 89, 90, 91, 92, 93, 94, 95, 95A, 95B, 96      | 27, 28, 29, 30, 31, 32, 33, 34, 35         | 47, 48, 49, 50, 51, 52, 52A, 53, 54, 55, 56, 57, 58, 59 | 94, 95, 96, 97, 98, 99, 100, 100A, 100B, 100C, 100D, 101, 102                               |
| 4GXU_NM   | 27, 27A, 27B, 28, 29, 30, 31, 32, 33, 34               | 46, 47, 48, 49, 50, 51, 52, 53, 54, 55, 56 | 89, 90, 91, 92, 93, 94, 95, 95A, 95B, 95C, 96 | 27, 28, 29, 30, 31, 32, 33, 34, 35         | 47, 48, 49, 50, 51, 52, 52A, 53, 54, 55, 56, 57, 58, 59 | 94, 95, 96, 97, 98, 99, 100, 100A, 100B, 100C, 100D, 100E, 100F, 100G, 100H, 100I, 101, 102 |

\* PDB code and chain identifiers are reported, in the order light/heavy chain.

**Supporting Table 3:** List of antibodies complementarity-determining regions (CDRs) in antibody/antigen complexes used to drive docking simulation in HADDOCK; data calculated by PARATOME webserver. For the other type of complexes, restraints to drive the docking were derived from bioinformatics predictions by CPORT (<http://haddock.chem.uu.nl/services/CPORT/>). The full list of the CPORT predicted residues is reported in the online set of HADDOCK decoys provided.

## References

- [1] Lee, J. H., Rangarajan, E. S., Yogesha, S. D. & Izard, T. (2009). Raver1 interactions with vinculin and RNA suggest a feed-forward pathway in directing mRNA to focal adhesions. *Structure* 17, 833–842.
- [2] Paavilainen, V. O., Oksanen, E., Goldman, A. & Lappalainen, P. (2008). Structure of the actin-depolymerizing factor homology domain in complex with actin. *J. Cell Biol.* 182, 51–59.
- [3] Trillo-Muyo, S., Martinez-Rodriguez, S., Arolas, J. L. & Gomis-Ruth, F. X. (2013). Mechanism of action of a janus-faced single-domain protein inhibitor simultaneously targeting two peptidase classes. *Chem. Sci.* 4, 791–797.
- [4] Shimaoka, M., Kim, M., Cohen, E. H., Yang, W., Astrof, N., Peer, D., Salas, A., Ferrand, A. & Springer, T. A. (2006). AL-57, a ligand-mimetic antibody to integrin LFA-1, reveals chemokine-induced affinity up-regulation in lymphocytes. *Proc. Natl. Acad. Sci. U.S.A.* 103, 13991–13996.
- [5] Lorenz, S. H., Jakob, R. P., Weininger, U., Balbach, J., Dobbek, H. & Schmid, F. X. (2011). The filamentous phages fd and IF1 use different mechanisms to infect *Escherichia coli*. *J. Mol. Biol.* 405, 989–1003.
- [6] Fodor, K., Wolf, J., Erdmann, R., Schliebs, W. & Wilmanns, M. (2012). Molecular requirements for peroxisomal targeting of alanine-glyoxylate aminotransferase as an essential determinant in primary hyperoxaluria type 1. *PLoS Biol.* 10, e1001309.
- [7] Chan, B., Lanyi, A., Song, H. K., Griesbach, J., Simarro-Grande, M., Poy, F., Howie, D., Sumegi, J., Terhorst, C. & Eck, M. J. (2003). SAP couples Fyn to SLAM immune receptors. *Nat. Cell Biol.* 5, 155–160.
- [8] Sekiyama, N., Arita, K., Ikeda, Y., Hashiguchi, K., Ariyoshi, M., Tochio, H., Saitoh, H. & Shirakawa, M. (2010). Structural basis for regulation of poly-SUMO chain by a SUMO-like domain of Nip45. *Proteins* 78, 1491–1502.
- [9] Cardoso, R., Love, R., Nilsson, C. L., Bergqvist, S., Nowlin, D., Yan, J., Liu, K. K., Zhu, J., Chen, P., Deng, Y. L., Dyson, H. J., Greig, M. J. & Brooun, A. (2012). Identification of Cys255 in HIF-1 as a novel site for development of covalent inhibitors of HIF-1/ARNT PasB domain protein-protein interaction. *Protein Sci.* 21, 1885–1896.
- [10] Bajic, G., Yatime, L., Sim, R. B., Vorup-Jensen, T. & Andersen, G. R. (2013). Structural insight on the recognition of surface-bound opsonins by the integrin I domain of complement receptor 3. *Proc. Natl. Acad. Sci. U.S.A.* 110, 16426–16431.
- [11] Dahl, J. U., Radon, C., Buhning, M., Nimtz, M., Leichert, L. I., Denis, Y., Jourlin-Castelli, C., Iobbi-Nivol, C., Mejean, V. & Leimkuhler, S. (2013). The sulfur carrier protein TusA has a pleiotropic role in *Escherichia coli* that also affects molybdenum cofactor biosynthesis. *J. Biol. Chem.* 288, 5426–5442.
- [12] Cupelli, K., Muller, S., Persson, B. D., Jost, M., Arnberg, N. & Stehle, T. (2010). Structure of adenovirus type 21 knob in complex with CD46 reveals key differences in receptor contacts among species B adenoviruses. *J. Virol.* 84, 3189–3200.
- [13] Callaway, K., Abramczyk, O., Martin, L. & Dalby, K. N. (2007). The anti-apoptotic protein PEA-15 is a tight binding inhibitor of ERK1 and ERK2, which blocks docking interactions at the D-recruitment site. *Biochemistry* 46, 9187–9198.

- [14] Cuneo, M. J. & London, R. E. (2010). Oxidation state of the XRCC1 N-terminal domain regulates DNA polymerase beta binding affinity. *Proc. Natl. Acad. Sci. U.S.A.* 107, 6805–6810.
- [15] Beernink, P. T., Hwang, M., Ramirez, M., Murphy, M. B., Doyle, S. A. & Thelen, M. P. (2005). Specificity of protein interactions mediated by BRCT domains of the XRCC1 DNA repair protein. *J. Biol. Chem.* 280, 30206–30213.
- [16] Arac, D., Boucard, A. A., Ozkan, E., Strop, P., Newell, E., Sudhof, T. C. & Brunger, A. T. (2007). Structures of neuroligin-1 and the neuroligin-1/neurexin-1 beta complex reveal specific protein-protein and protein-Ca<sup>2+</sup> interactions. *Neuron* 56, 992–1003.
- [17] Krishna Kumar, K., Jacques, D. A., Pishchany, G., Caradoc-Davies, T., Spirig, T., Malmirchegini, G. R., Langley, D. B., Dickson, C. F., Mackay, J. P., Clubb, R. T., Skaar, E. P., Guss, J. M. & Gell, D. A. (2011). Structural basis for hemoglobin capture by *Staphylococcus aureus* cell-surface protein, IsdH. *J. Biol. Chem.* 286, 38439–38447.
- [18] Takeda, S., Minakata, S., Koike, R., Kawahata, I., Narita, A., Kitazawa, M., Ota, M., Yamakuni, T., Maeda, Y. & Nitani, Y. (2010). Two distinct mechanisms for actin capping protein regulation—steric and allosteric inhibition. *PLoS Biol.* 8, e1000416.
- [19] Chruszcz, M., Pomes, A., Glesner, J., Vailes, L. D., Osinski, T., Porebski, P. J., Majorek, K. A., Heymann, P. W., Platts-Mills, T. A., Minor, W. & Chapman, M. D. (2012). Molecular determinants for antibody binding on group 1 house dust mite allergens. *J. Biol. Chem.* 287, 7388–7398.
- [20] Schonfeld, D., Matschiner, G., Chatwell, L., Trentmann, S., Gille, H., Hulsmeyer, M., Brown, N., Kaye, P. M., Schlehuber, S., Hohlbaum, A. M. & Skerra, A. (2009). An engineered lipocalin specific for CTLA-4 reveals a combining site with structural and conformational features similar to antibodies. *Proc. Natl. Acad. Sci. U.S.A.* 106, 8198–8203.
- [21] Maun, H. R., Wen, X., Lingel, A., de Sauvage, F. J., Lazarus, R. A., Scales, S. J. & Hymowitz, S. G. (2010). Hedgehog pathway antagonist 5E1 binds hedgehog at the pseudo-active site. *J. Biol. Chem.* 285, 26570–26580.
- [22] Tsibane, T., Ekiert, D. C., Krause, J. C., Martinez, O., Crowe, J. E., Wilson, I. A. & Basler, C. F. (2012). Influenza human monoclonal antibody 1F1 interacts with three major antigenic sites and residues mediating human receptor specificity in H1N1 viruses. *PLoS Pathog.* 8, e1003067.
- [23] Blech, M., Peter, D., Fischer, P., Bauer, M. M., Hafner, M., Zeeb, M. & Nar, H. (2013). One target-two different binding modes: structural insights into gevokizumab and canakinumab interactions to interleukin-1. *J. Mol. Biol.* 425, 94–111.
- [24] Watts, N. R., Vethanayagam, J. G., Ferns, R. B., Tedder, R. S., Harris, A., Stahl, S. J., Steven, A. C. & Wingfield, P. T. (2010). Molecular basis for the high degree of antigenic cross-reactivity between hepatitis B virus capsids (HBcAg) and dimeric capsid-related protein (HBeAg): insights into the enigmatic nature of the e-antigen. *J. Mol. Biol.* 398, 530–541.
- [25] Piehler, J., Roisman, L. C. & Schreiber, G. (2000). New structural and functional aspects of the type I interferon-receptor interaction revealed by comprehensive mutational analysis of the binding interface. *J. Biol. Chem.* 275, 40425–40433.
- [26] Li, S., Wang, H., Peng, B., Zhang, M., Zhang, D., Hou, S., Guo, Y. & Ding, J. (2009). Efalizumab binding to the LFA-1 alphaL I domain blocks ICAM-1 binding via steric hindrance. *Proc. Natl. Acad. Sci. U.S.A.* 106, 4349–4354.

- [27] Gershon, P. D. & Khilko, S. (1995). Stable chelating linkage for reversible immobilization of oligohistidine tagged proteins in the BIAcore surface plasmon resonance detector. *J. Immunol. Methods* 183, 65–76.
- [28] Dreyfus, C., Laursen, N. S., Kwaks, T., Zuijdggeest, D., Khayat, R., Ekiert, D. C., Lee, J. H., Metlagel, Z., Bujny, M. V., Jongeneelen, M., van der Vlugt, R., Lamrani, M., Korse, H. J., Geelen, E., Sahin, O., Sieuwerts, M., Brakenhoff, J. P., Vogels, R., Li, O. T., Poon, L. L., Peiris, M., Koudstaal, W., Ward, A. B., Wilson, I. A., Goudsmit, J. & Friesen, R. H. (2012). Highly conserved protective epitopes on influenza B viruses. *Science* 337, 1343–1348.
- [29] Wu, C., Sakorafas, P., Miller, R., McCarthy, D., Scesney, S., Dixon, R. & Ghayur, T. (2003). IL-18 receptor beta-induced changes in the presentation of IL-18 binding sites affect ligand binding and signal transduction. *J. Immunol.* 170, 5571–5577.
- [30] Antonyuk, S. V., Trevitt, C. R., Strange, R. W., Jackson, G. S., Sangar, D., Batchelor, M., Cooper, S., Fraser, C., Jones, S., Georgiou, T., Khalili-Shirazi, A., Clarke, A. R., Hasnain, S. S. & Collinge, J. (2009). Crystal structure of human prion protein bound to a therapeutic antibody. *Proc. Natl. Acad. Sci. U.S.A.* 106, 2554–2558.
- [31] Fransson, J., Teplyakov, A., Raghunathan, G., Chi, E., Cordier, W., Dinh, T., Feng, Y., Giles-Komar, J., Gilliland, G., Lollo, B., Malia, T. J., Nishioka, W., Obmolova, G., Zhao, S., Zhao, Y., Swanson, R. V. & Almagro, J. C. (2010). Human framework adaptation of a mouse anti-human IL-13 antibody. *J. Mol. Biol.* 398, 214–231.
- [32] Das, A., Sweet, R., Tsui, P., Bethea, D., Wu, S., Kang, J. & Baker, A. (2009). Anti- mcp-1 antibodies, compositions, methods and uses. WO Patent App. PCT/US2008/068,696 .
- [33] Lim, D., Park, H. U., De Castro, L., Kang, S. G., Lee, H. S., Jensen, S., Lee, K. J. & Strynadka, N. C. (2001). Crystal structure and kinetic analysis of beta-lactamase inhibitor protein-II in complex with TEM-1 beta-lactamase. *Nat. Struct. Biol.* 8, 848–852.
- [34] Wu, S. J., Luo, J., O’Neil, K. T., Kang, J., Lacy, E. R., Canziani, G., Baker, A., Huang, M., Tang, Q. M., Raju, T. S., Jacobs, S. A., Teplyakov, A., Gilliland, G. L. & Feng, Y. (2010). Structure-based engineering of a monoclonal antibody for improved solubility. *Protein Eng. Des. Sel.* 23, 643–651.
